# Supplementary material
Source: Research Square preprint supplement (doi:10.21203/rs.3.rs-9899291/v1)

Extended Data Figure 2 (Choi et. al.)

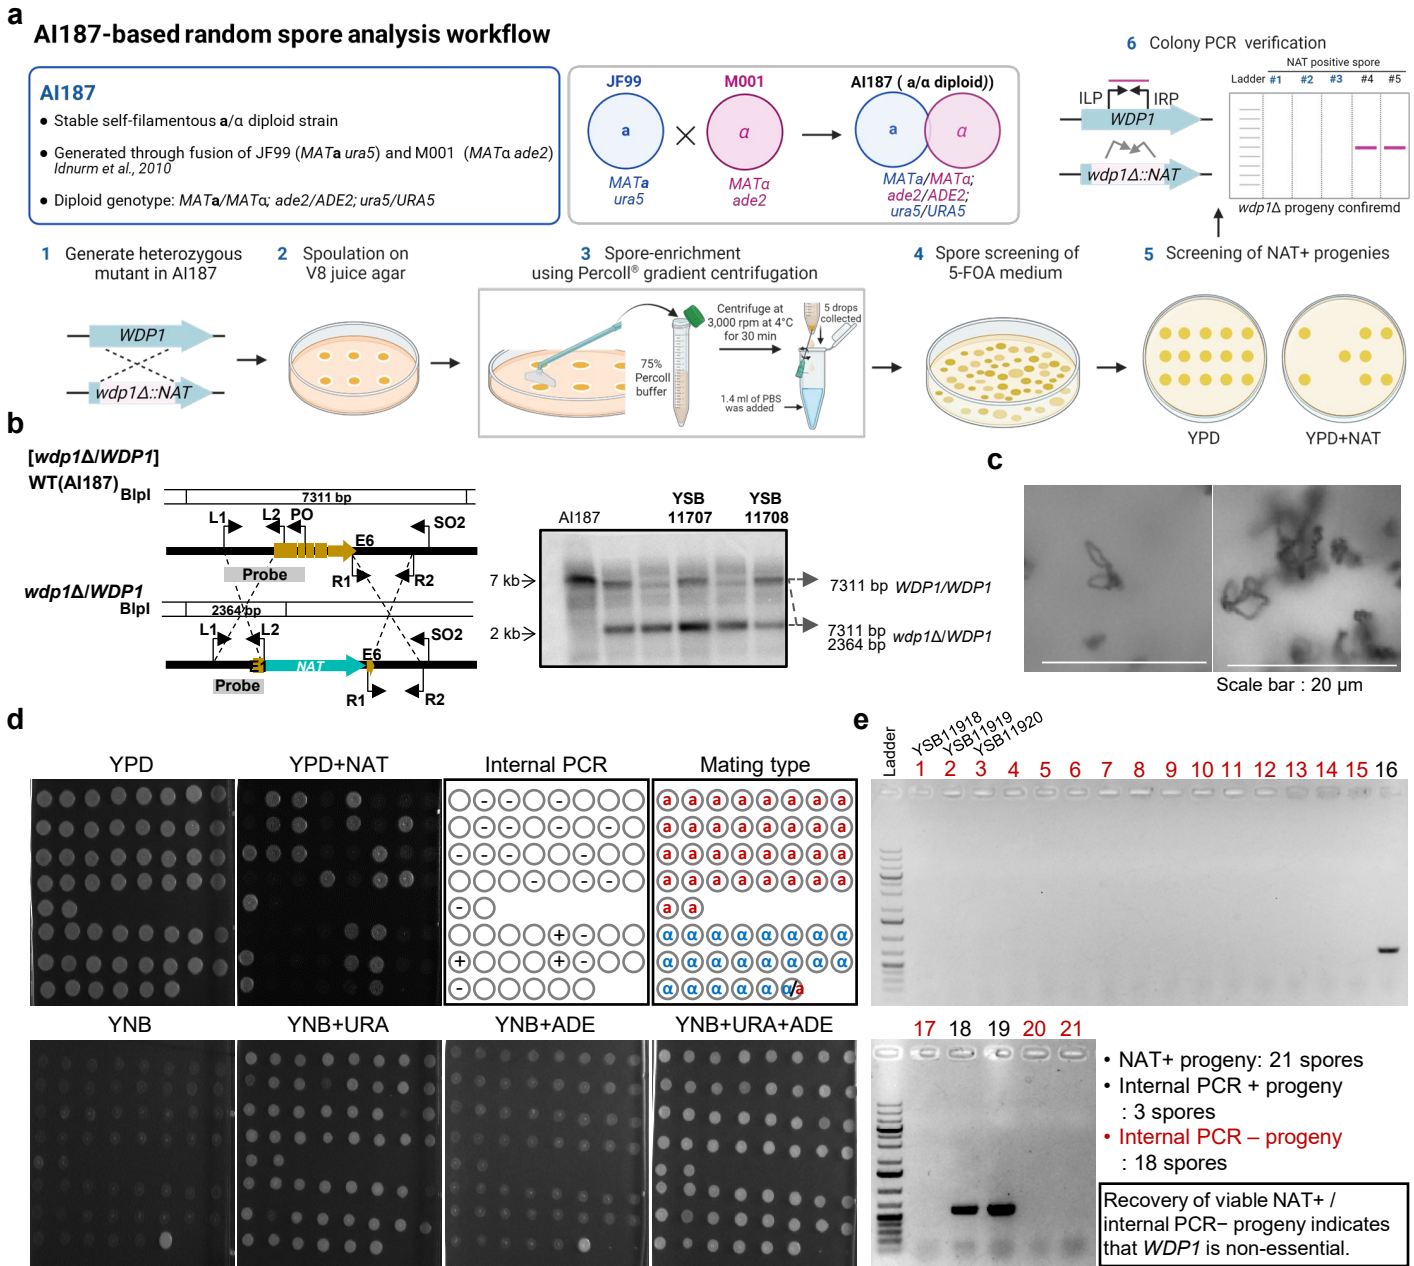

Extended Data Figure 3 (Choi et. al.)

**a**

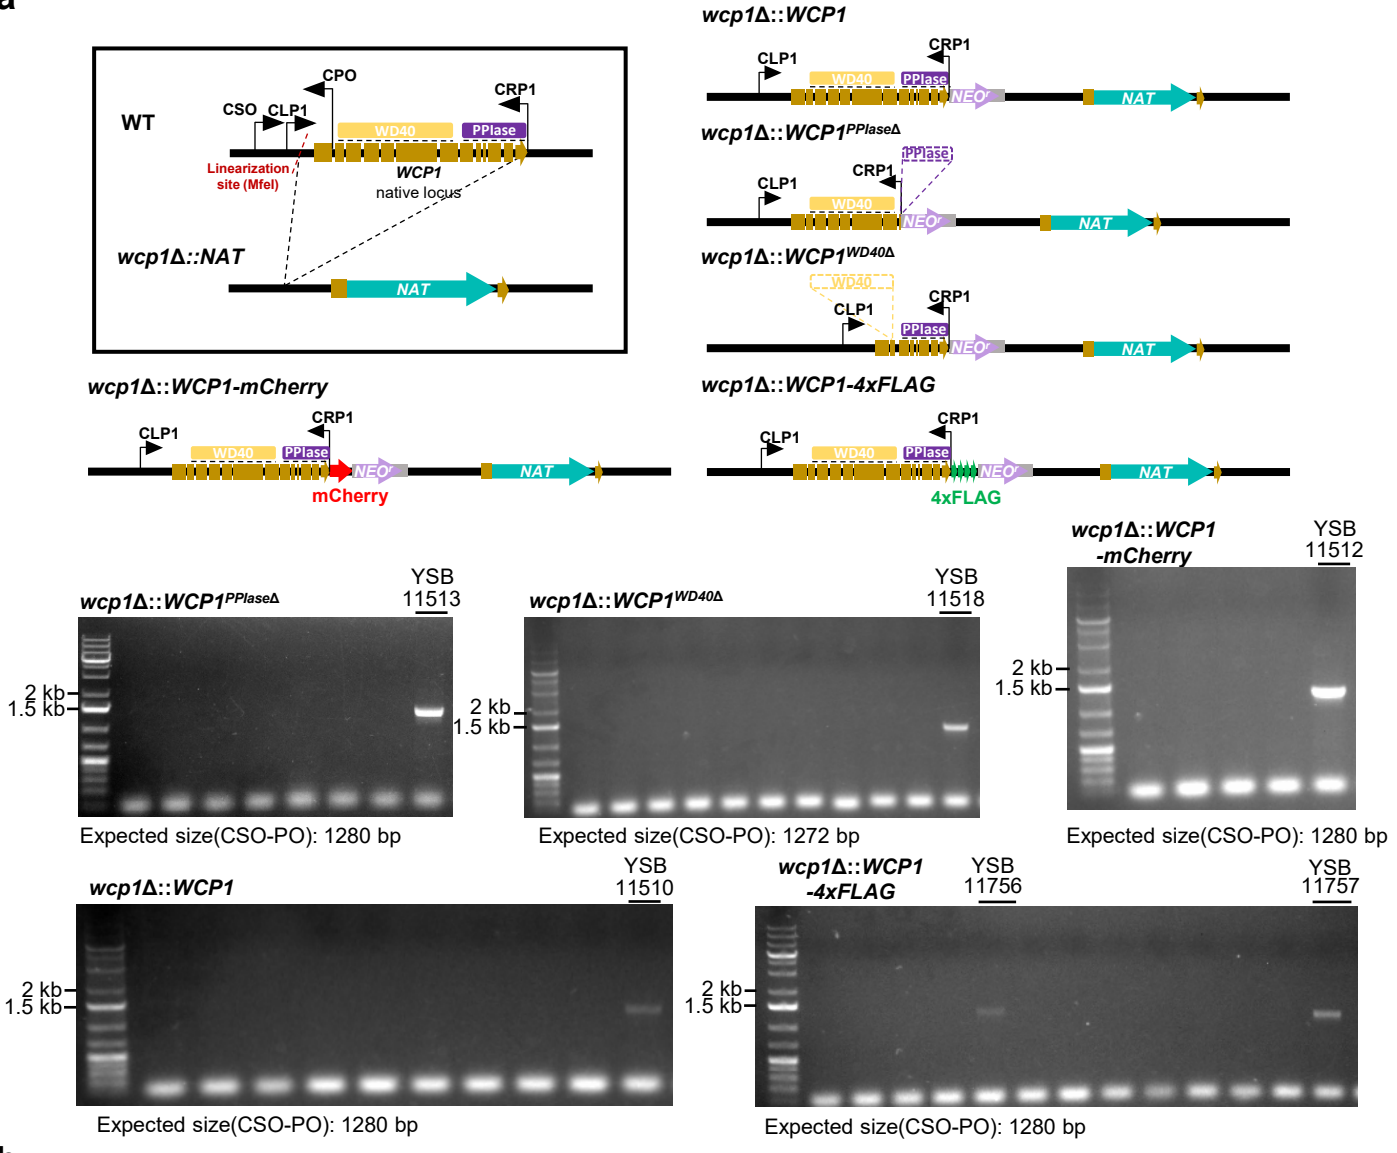

**b**

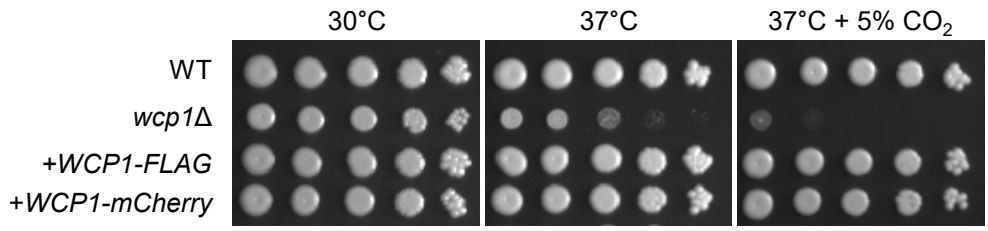

**c**

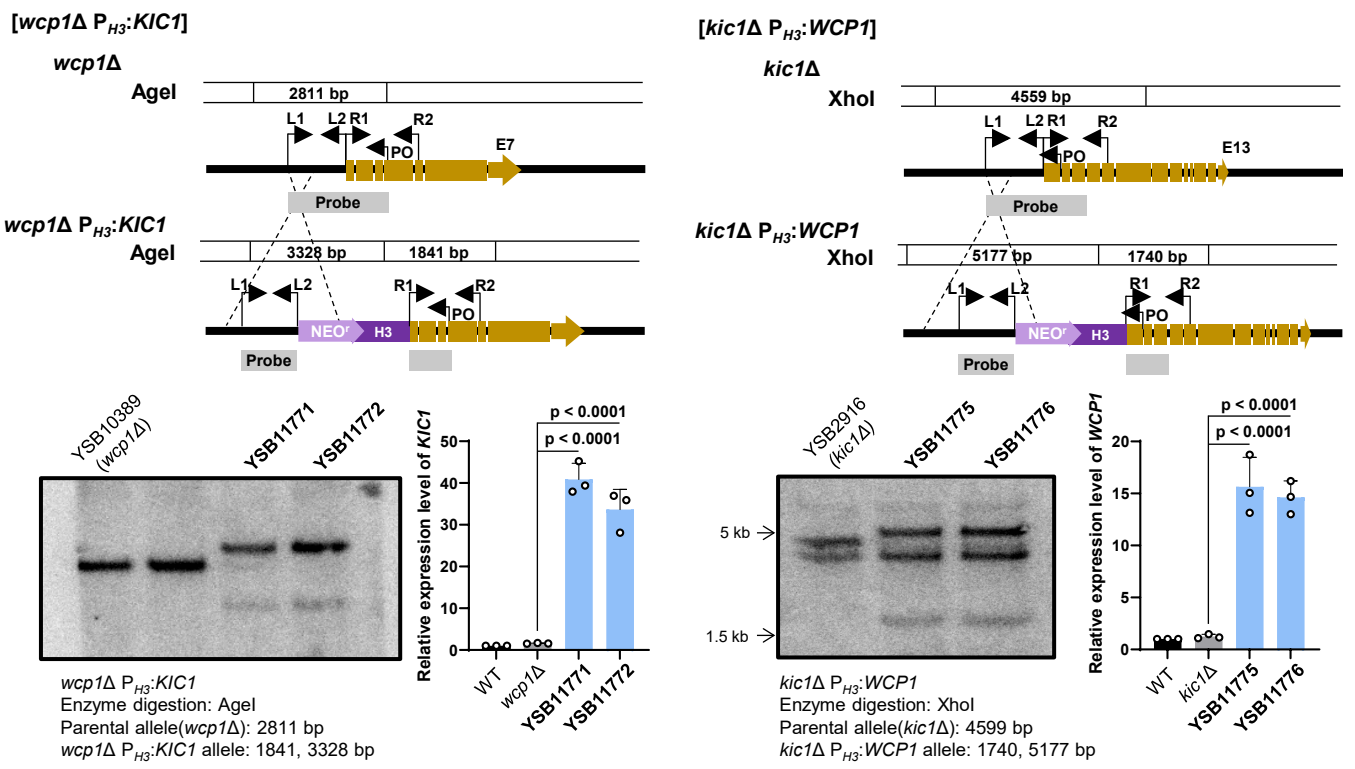

Extended Data Figure 4 (Choi et. al.)

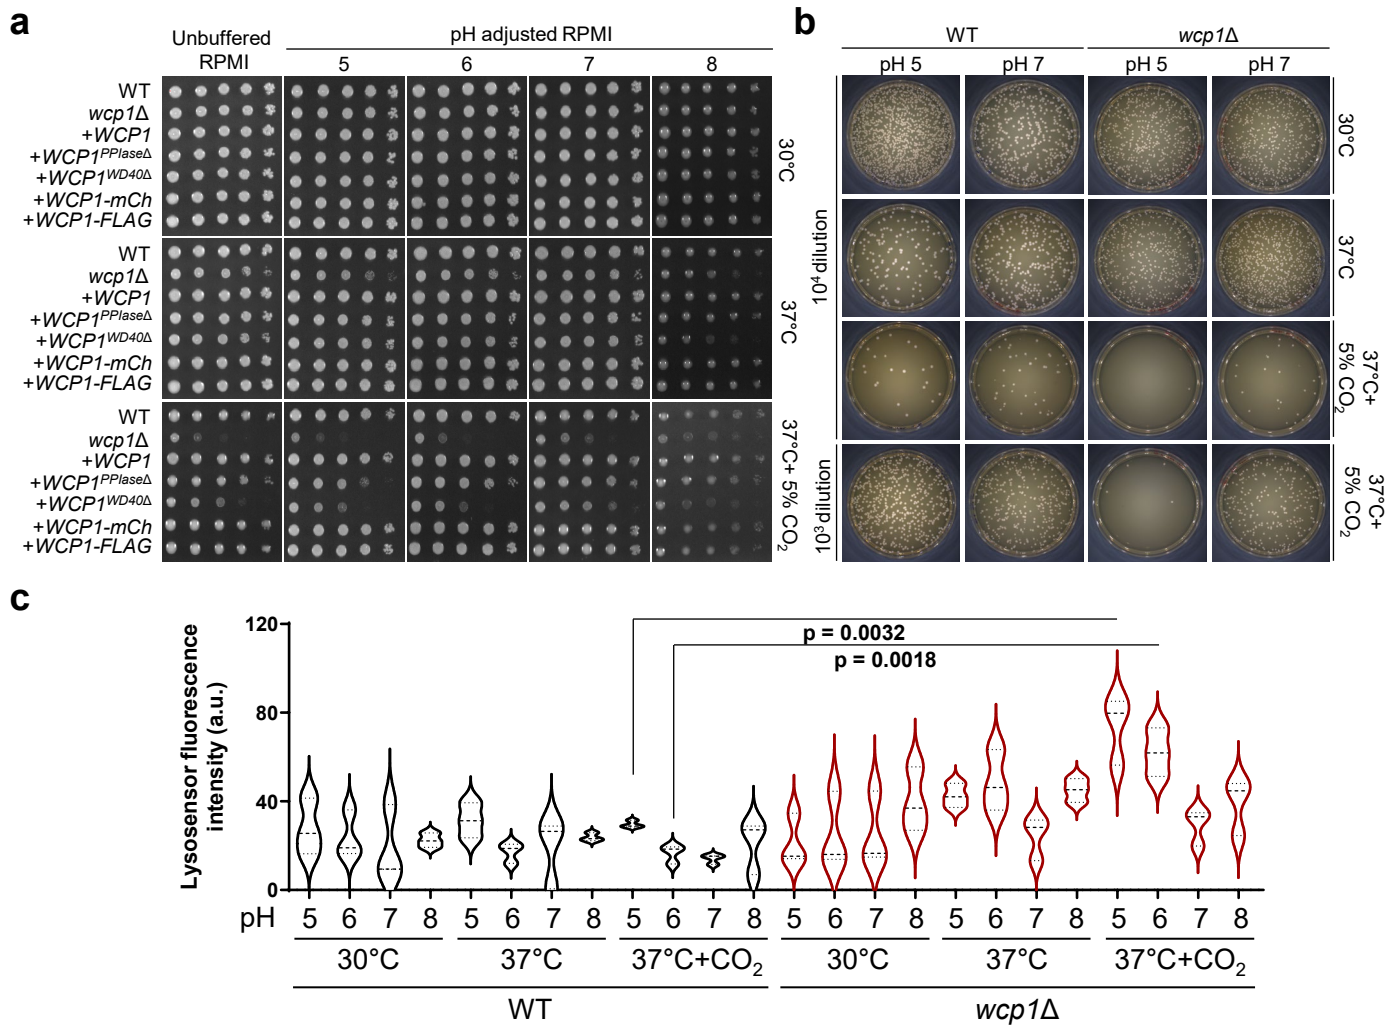

Extended Data Figure 5 (Choi et. al.)

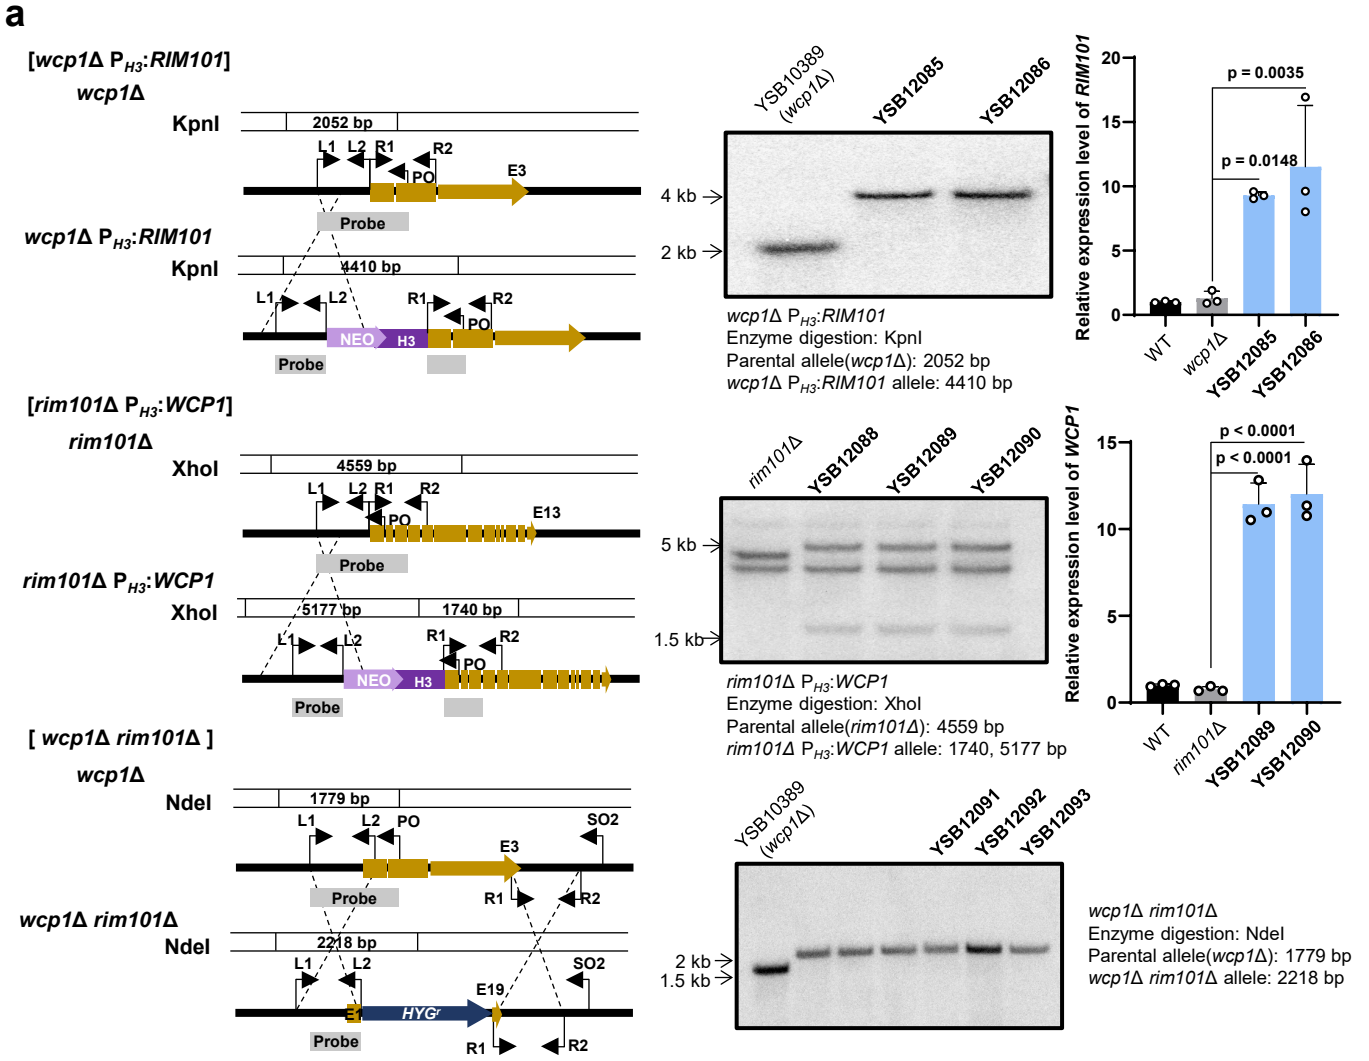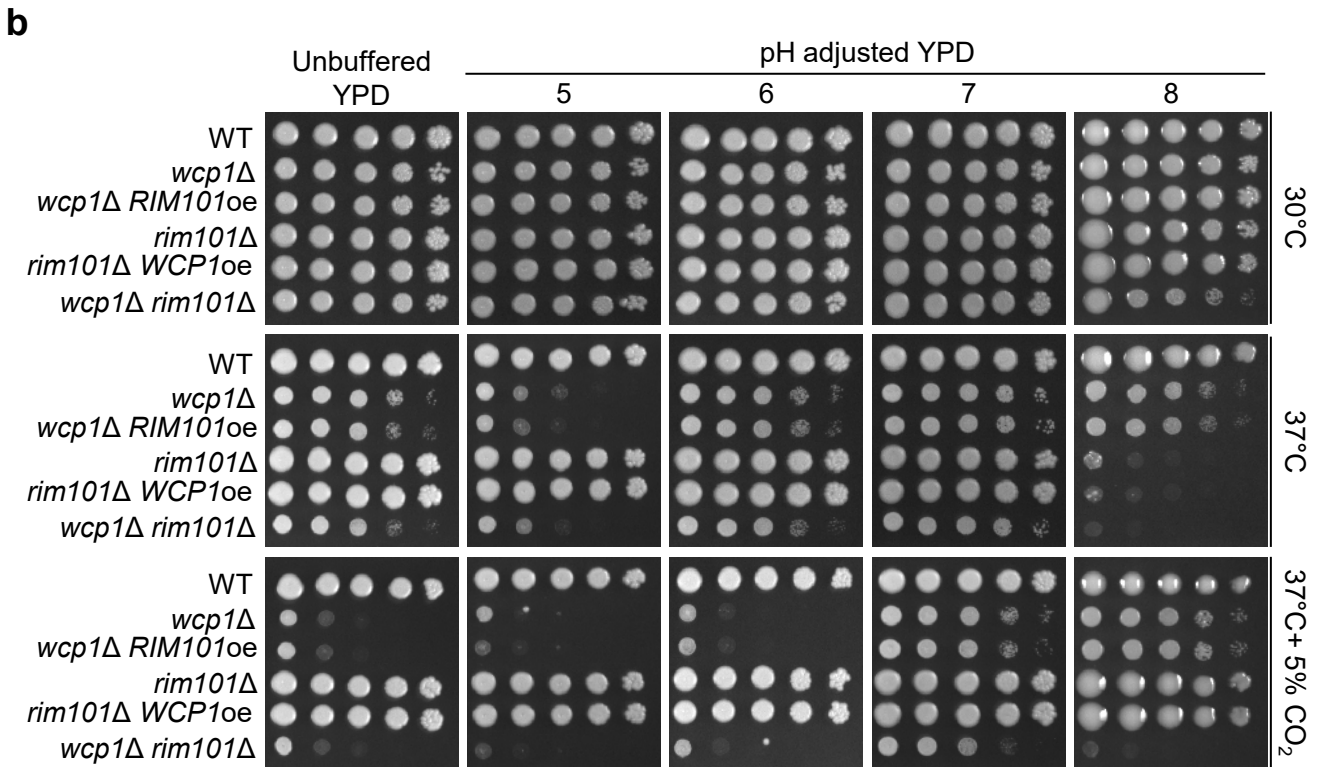

Extended Data Figure 6 (Choi et. al.)

**a**

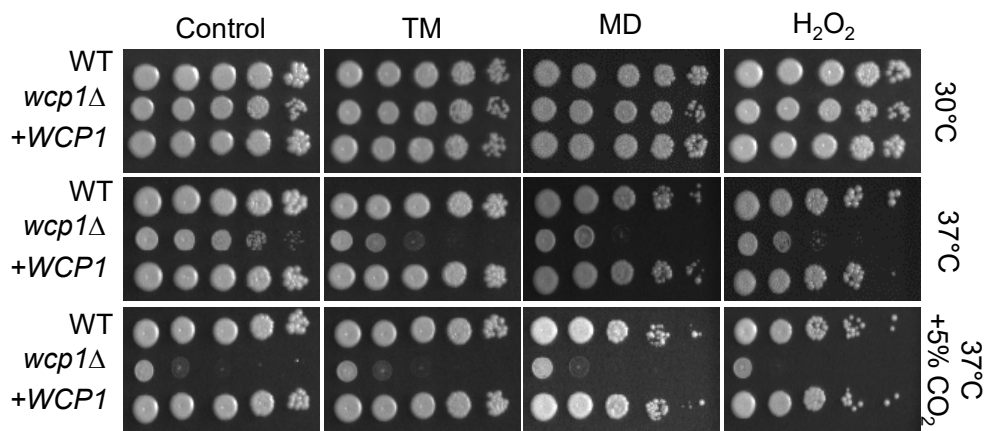

**b**

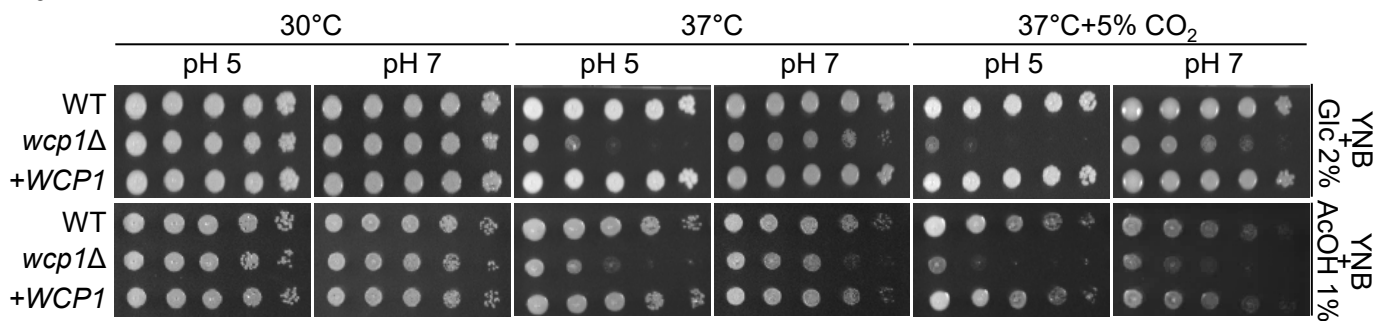

Extended Data Figure 7 (Choi et. al.)

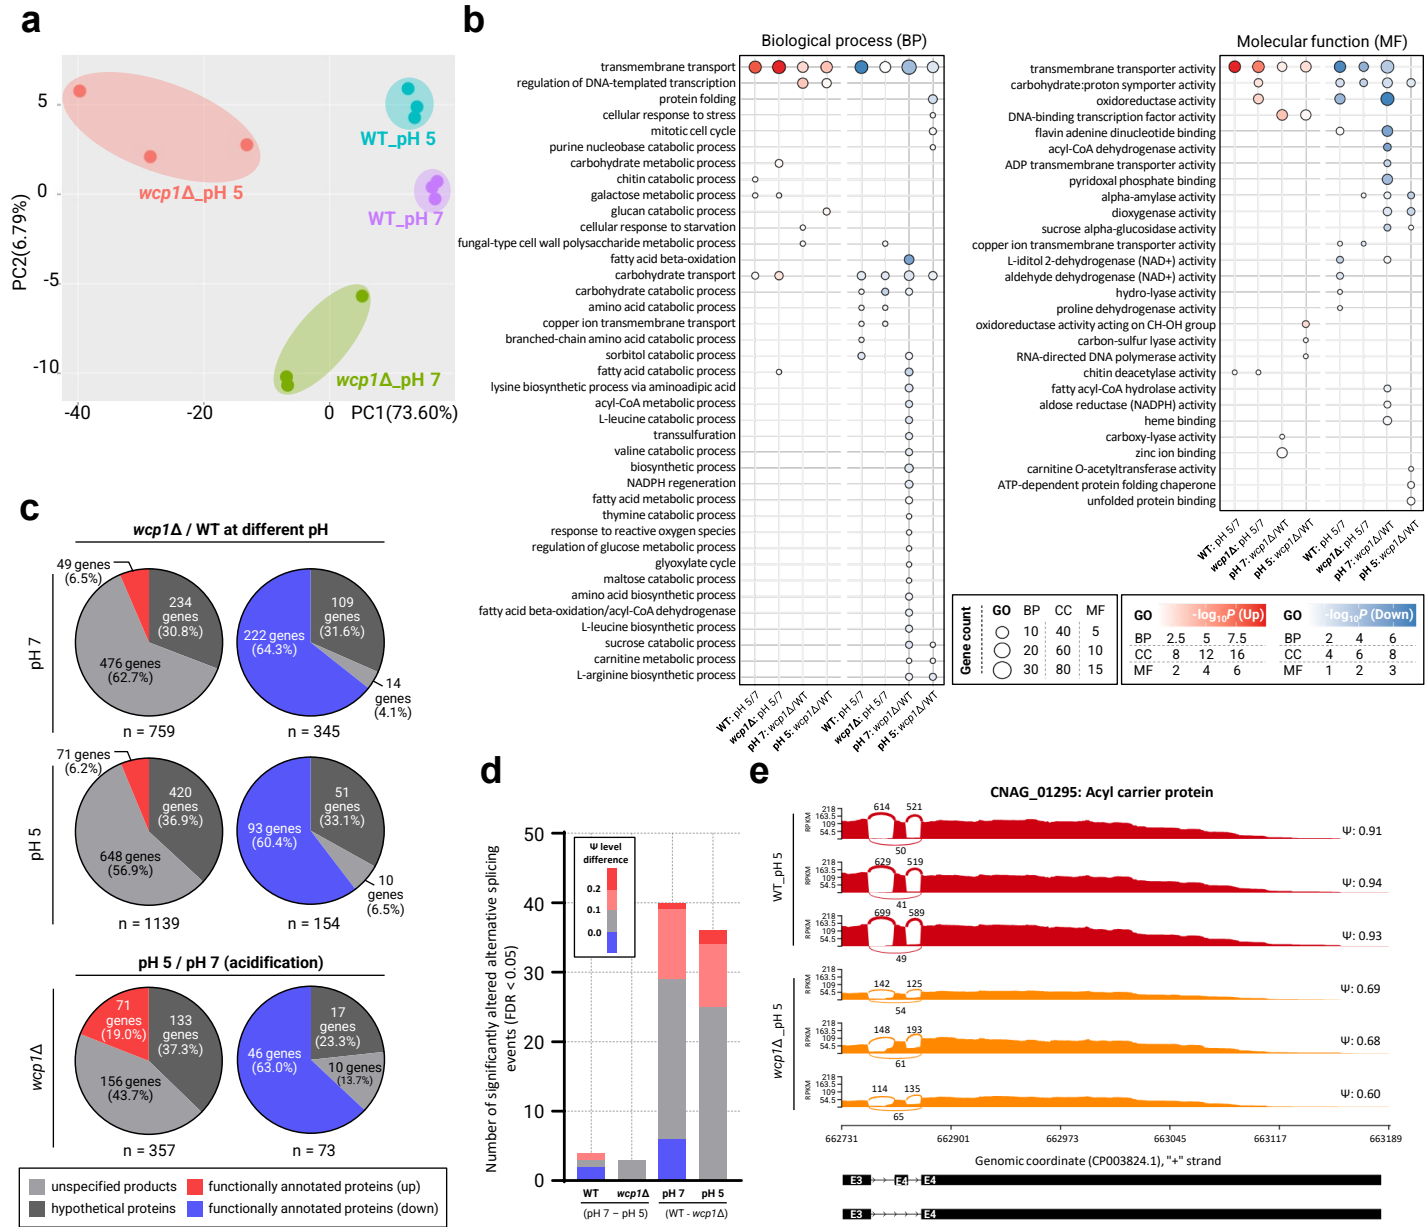

Supplement: Supplementary file [file 030fdbab444b912801333cd7.pdf]
